# Supplementary material for: A Distinct Colon-Derived Breath Metabolome is Associated with Inflammatory Bowel Disease, but not its Complications
Source: PubMed Central journal article supplement — Clin Transl Gastroenterol. 2016 Nov 10;7(11):e201–. doi: 10.1038/ctg.2016.57 (PMC5288568; doi:10.1038/ctg.2016.57), 2016-11-10
Supplement: ctg201657x2.pdf [file ctg201657x2.pdf]

**Supplemental Table 1:** Imaging score for disease activity in CT enterography and MR enterography

| Variable/score              | 0               | 1                                                                   | 2                                                                      | 3                                                                                                                                                 |
|-----------------------------|-----------------|---------------------------------------------------------------------|------------------------------------------------------------------------|---------------------------------------------------------------------------------------------------------------------------------------------------|
| Mural thickening            | No Inflammation | Mild Inflammation: Hyper enhancement with wall thickening of 3-5 mm | Moderate Inflammation: Hyper enhancement with wall thickening of >5 mm | Marked Inflammation: Hyper enhancement with wall thickening of $\geq$ 10 mm or >5 mm thickening with peri-enteric stranding or penetrating ulcers |
| Length of bowel involvement | 0% involvement  | <50% involvement                                                    | 50-75% involvement                                                     | >75% involvement                                                                                                                                  |

| Variable/site                    | Duodenum | Jejunum | Ileum | Ascending colon | Transverse colon | Descending colon | Rectum | Total score |
|----------------------------------|----------|---------|-------|-----------------|------------------|------------------|--------|-------------|
| Mural inflammation               | 0-3      | 0-3     | 0-3   | 0-3             | 0-3              | 0-3              | 0-3    | 0-21        |
| Length of bowel segment involved | 0-3      | 0-3     | 0-3   | 0-3             | 0-3              | 0-3              | 0-3    | 0-21        |
| Total score                      | 0-6      | 0-6     | 0-6   | 0-6             | 0-6              | 0-6              | 0-6    | 0-42        |

Maximum score possible per row: 21, maximum score possible per column: 6, total score possible: 42
