# Supplementary material for: A Distinct Colon-Derived Breath Metabolome is Associated with Inflammatory Bowel Disease, but not its Complications
Source: PubMed Central journal article supplement — Clin Transl Gastroenterol. 2016 Nov 10;7(11):e201–. doi: 10.1038/ctg.2016.57 (PMC5288568; doi:10.1038/ctg.2016.57), 2016-11-10
Supplement: ctg201657x3.pdf [file ctg201657x3.pdf]

**Supplemental Table 2: Breath VOCs in IBD (Adjusted for Age at Diagnosis and Disease Duration)**

| <b>Factor</b>           | <b>CD<br/>(N=24)</b> | <b>UC<br/>(N=11)</b> | <b>p-value</b> |
|-------------------------|----------------------|----------------------|----------------|
| <b>2-propanol</b>       | 83.6 (67.2, 103.9)   | 90.8 (65.2, 126.6)   | 0.67           |
| <b>acetaldehyde</b>     | 39.6 (34.2, 46.0)    | 43.6 (34.8, 54.6)    | 0.48           |
| <b>acetone</b>          | 219.7 (175.5, 275.1) | 179.5 (127.5, 252.8) | 0.32           |
| <b>acetonitrile*</b>    | 15.7 (13.1, 18.9)    | 12.1 (9.1, 16.0)     | 0.12           |
| <b>acrylonitrile</b>    | 1.1 (0.98, 1.3)      | 1.2 (0.97, 1.4)      | 0.62           |
| <b>benzene</b>          | 4.3 (3.8, 4.9)       | 3.7 (3.1, 4.6)       | 0.25           |
| <b>carbon disulfide</b> | 4.4 (3.8, 5.1)       | 4.3 (3.4, 5.3)       | 0.76           |
| <b>dimethyl sulfide</b> | 2.9 (2.5, 3.4)       | 3.1 (2.4, 3.9)       | 0.7            |
| <b>ethanol</b>          | 115.2 (100.1, 132.7) | 123.1 (99.3, 152.7)  | 0.61           |
| <b>isoprene</b>         | 31.7 (25.7, 39.2)    | 21.7 (15.7, 29.9)    | 0.054          |
| <b>pentane</b>          | 20.7 (18.3, 23.4)    | 18.1 (15.0, 21.9)    | 0.24           |
| <b>1-decene</b>         | 5.5 (3.9, 7.8)       | 5.1 (3.0, 8.6)       | 0.79           |
| <b>1-heptene</b>        | 12.7 (8.0, 20.0)     | 8.6 (4.3, 17.1)      | 0.34           |
| <b>1-nonene</b>         | 4.4 (3.3, 5.9)       | 4.2 (2.7, 6.6)       | 0.88           |
| <b>1-octene</b>         | 21.1 (17.2, 25.9)    | 19.6 (14.3, 26.8)    | 0.68           |
| <b>3-methylhexane</b>   | 33.4 (29.3, 38.0)    | 31.3 (25.7, 38.1)    | 0.57           |
| <b>(E)-2-nonene</b>     | 2.8 (2.0, 3.8)       | 2.2 (1.4, 3.6)       | 0.44           |
| <b>ammonia</b>          | 76.6 (64.5, 90.9)    | 76.0 (58.5, 98.6)    | 0.96           |
| <b>ethane</b>           | 95.3 (85.1, 106.7)   | 92.6 (78.0, 110.0)   | 0.78           |
| <b>hydrogen sulfide</b> | 0.47 (0.38, 0.57)    | 0.52 (0.38, 0.70)    | 0.56           |
| <b>triethyl amine</b>   | 1.4 (1.2, 1.6)       | 1.1 (0.90, 1.5)      | 0.24           |
| <b>trimethyl amine</b>  | 11.3 (9.2, 13.8)     | 8.5 (6.2, 11.5)      | 0.13           |

UC: Ulcerative colitis; CD: Crohn's disease

Values presented as Mean (95% CL) and were obtained using ANCOVA analysis. The logarithm of each VOC was modeled as the outcome variable with age at diagnosis and disease duration at time of breath test as the independent variables. VOC values are presented as parts per billion.
