# Supplementary material for: A Distinct Colon-Derived Breath Metabolome is Associated with Inflammatory Bowel Disease, but not its Complications
Source: PubMed Central journal article supplement — Clin Transl Gastroenterol. 2016 Nov 10;7(11):e201–. doi: 10.1038/ctg.2016.57 (PMC5288568; doi:10.1038/ctg.2016.57), 2016-11-10
Supplement: ctg201657x7.pdf [file ctg201657x7.pdf]

Supplemental table 6: Demographic and clinical characteristics

| Factor                                      | Normal Pouch<br>(N=7) | Refractory Pouchitis<br>(N=10) | CD<br>(N=13)    | p-value                  |
|---------------------------------------------|-----------------------|--------------------------------|-----------------|--------------------------|
| <b>Gender</b>                               |                       |                                |                 | 0.41 <sup>c</sup>        |
| . Male                                      | 5(71.4)               | 4(40.0)                        | 6(46.2)         |                          |
| . Female                                    | 2(28.6)               | 6(60.0)                        | 7(53.8)         |                          |
| <b>Caucasian</b>                            | 7(100.0)              | 10(100.0)                      | 13(100.0)       | ---                      |
| <b>Age at IBD (yrs)</b>                     | 20.4±9.5              | 27.2±10.5                      | 25.3±13.2       | 0.49 <sup>a</sup>        |
| <b>Age at pouch (yrs)</b>                   | 32.9±9.4              | 40.2±10.6                      | 30.4±13.3       | 0.14 <sup>a</sup>        |
| <b>Age at sample (yrs)</b>                  | 42.7±11.6             | 51.0±8.8                       | 45.8±15.1       | 0.39 <sup>a</sup>        |
| <b>IBD duration at pouch (mo)</b>           | 138.4[43.9,246.8]     | 150.7[82.8,192.6]              | 55.0[23.9,83.8] | <b>0.014<sup>b</sup></b> |
| <b>Reason for pouch</b>                     |                       |                                |                 | 0.89 <sup>d</sup>        |
| . Dysplasia/cancer                          | 2(28.6)               | 4(40.0)                        | 4(30.8)         |                          |
| . Refractory disease                        | 5(71.4)               | 6(60.0)                        | 9(69.2)         |                          |
| <b>Pouch type</b>                           |                       |                                |                 | 0.99 <sup>d</sup>        |
| . J                                         | 7(100.0)              | 10(100.0)                      | 12(92.3)        |                          |
| . S                                         | 0(0.0)                | 0(0.0)                         | 1(7.7)          |                          |
| <b>Days from pouch to ileostomy closure</b> | 3.0[0.00,7.3]         | 3.0[2.8,4.0]                   | 4.4[3.0,8.0]    | 0.22 <sup>b</sup>        |
| <b>Pre-op diagnosis</b>                     |                       |                                |                 | 0.78 <sup>d</sup>        |
| . UC                                        | 6(85.7)               | 10(100.0)                      | 11(84.6)        |                          |
| . CD                                        | 0(0.0)                | 0(0.0)                         | 1(7.7)          |                          |
| . IC                                        | 1(14.3)               | 0(0.0)                         | 1(7.7)          |                          |
| <b>Extent of IBD pre-op</b>                 |                       |                                |                 | 0.57 <sup>d</sup>        |
| . Extensive colitis,                        | 7(100.0)              | 9(90.0)                        | 13(100.0)       |                          |
| . L sided colitis,                          | 0(0.0)                | 1(10.0)                        | 0(0.0)          |                          |
| <b>Perianal disease</b>                     | 1(14.3)               | 0(0.0)                         | 4(30.8)         | 0.16 <sup>d</sup>        |
| <b>Pre-op biologics</b>                     | 2(28.6)               | 3(30.0)                        | 2(15.4)         | 0.64 <sup>d</sup>        |
| <b>Pre-op Immunomodulators</b>              | 2(28.6)               | 6(60.0)                        | 1(7.7)          | <b>0.019<sup>d</sup></b> |
| <b>Family history of IBD</b>                | 1(14.3)               | 4(40.0)                        | 7(53.8)         | 0.26 <sup>d</sup>        |
| <b>PSC</b>                                  | 1(14.3)               | 4(40.0)                        | 1(7.7)          | 0.18 <sup>d</sup>        |

Values presented as Mean ± SD, Median [P25, P75] or N (column %).

p-values: a=ANOVA, b=Kruskal-Wallis test, c=Pearson's chi-square test, d=Fisher's Exact test.
